# Supplementary material
Source: HighWire-hosted journal article supplement (https://bmjopen.bmj.com/content/8/4/e020703)
Supplement: inline-supplementary-material-2 [file inline-supplementary-material-2.pdf]

**Appendix B.** A short question guide for the selection of relevant studies based on inclusion criteria.

| Item | Question                                                                                                       | Action                                        |
|------|----------------------------------------------------------------------------------------------------------------|-----------------------------------------------|
| 1    | Did the study use any of the eligible study design?                                                            | Yes, move to the next question<br>No, exclude |
| 2    | Did the study involve people with chronic shoulder pain?                                                       | Yes, move to the next question<br>No, exclude |
| 3    | Did the study report psychological measures?                                                                   | Yes, move to the next question<br>No, exclude |
| 4    | Did the study include a longitudinal design?                                                                   | Yes, move to the next question<br>No, exclude |
| 5    | Did the study include at least one association between psychological factors-pain intensity and/or disability? | Yes, include study<br>No, exclude             |
